# Supplementary material for: A novel imine-linked covalent organic framework for rapid detection of methyl paraoxon
Source: Royal Society of Chemistry journal article supplement (doi:10.1039/d1ay01617b), 2021-01-01
Supplement: d1ay01617b1.pdf [file d1ay01617b1.pdf]

**Supplementary Material**

**A novel imine linked covalent organic framework  
for rapid detection of methyl paraoxon**

Mengyao Li, Lulu Guo, Lili Chen<sup>\*1</sup>, Chunhua Lin and Li Wang

*Key Laboratory of Functional Small Organic Molecule, Ministry of Education, Key Laboratory of  
Chemical Biology, Jiangxi Province, College of Chemistry and Chemical Engineering, Jiangxi  
Normal University, 99 Ziyang Road, Nanchang 330022, China.*

---

<sup>1\*</sup> Corresponding author. E-mail: [chenlaura0797@163.com](mailto:chenlaura0797@163.com) (Lili Chen)

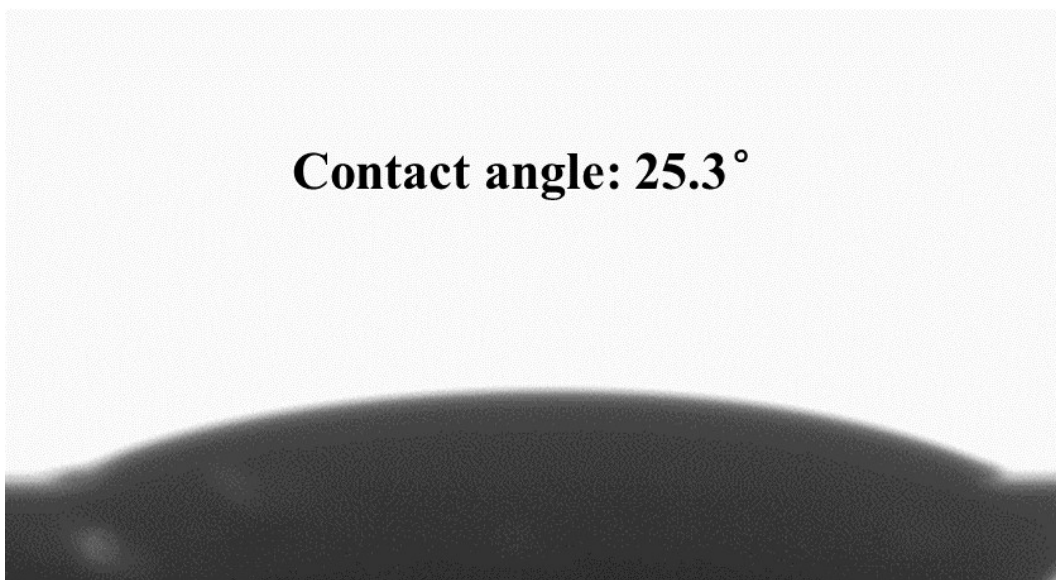

**Figure S1.** Water contact angle measurement of COF<sub>ML-DHTA</sub>

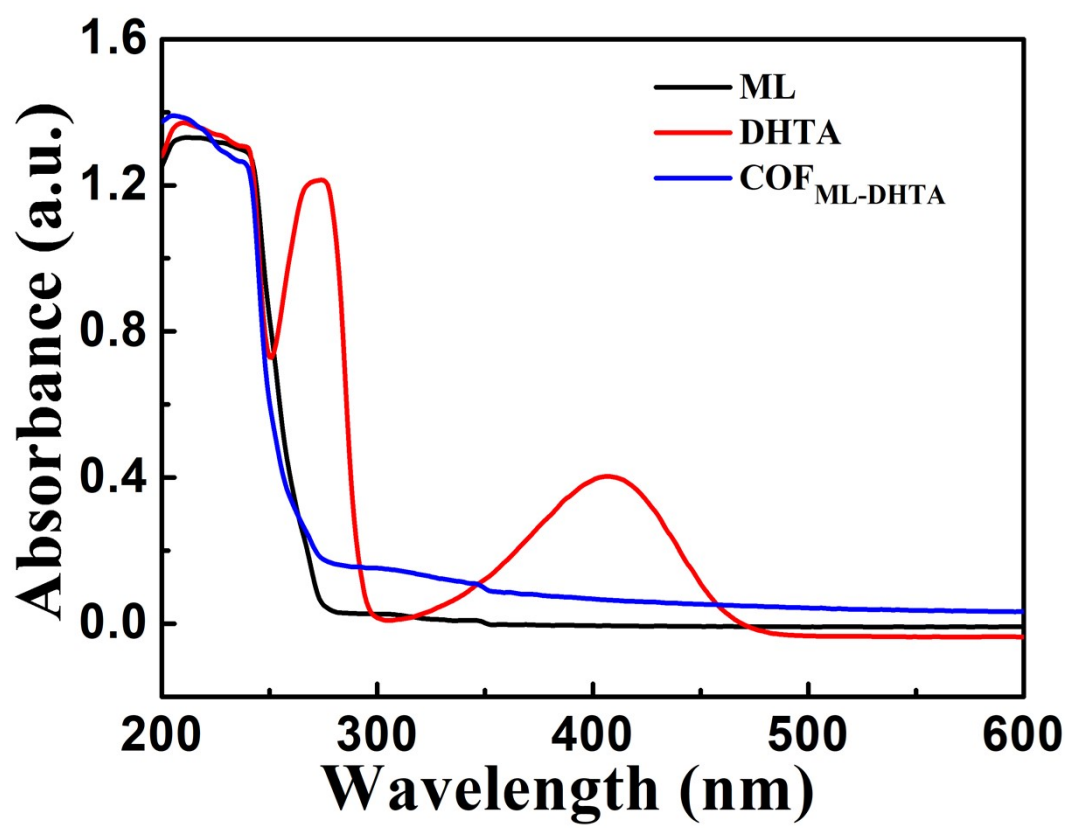

**Figure S2.** UV-vis absorption spectrum of ML, DHTA and COF<sub>ML-DHTA</sub>.

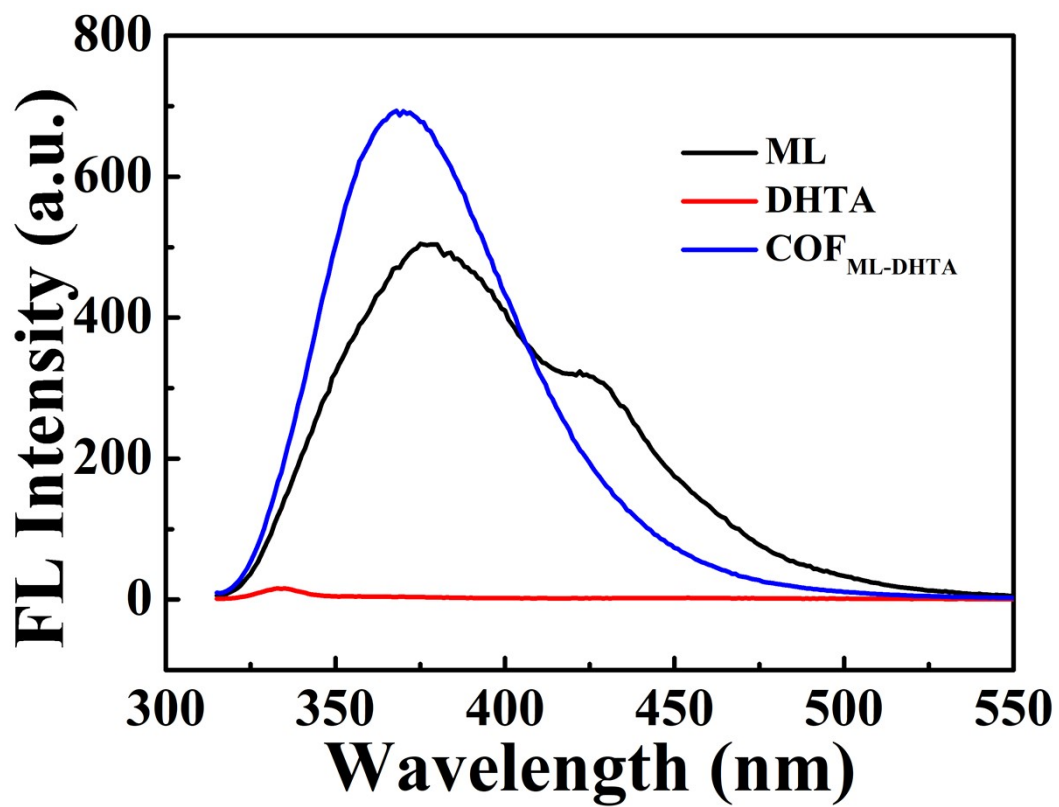

Figure S3. Fluorescence emission spectrum of ML, DHTA and COF<sub>ML-DHTA</sub>.

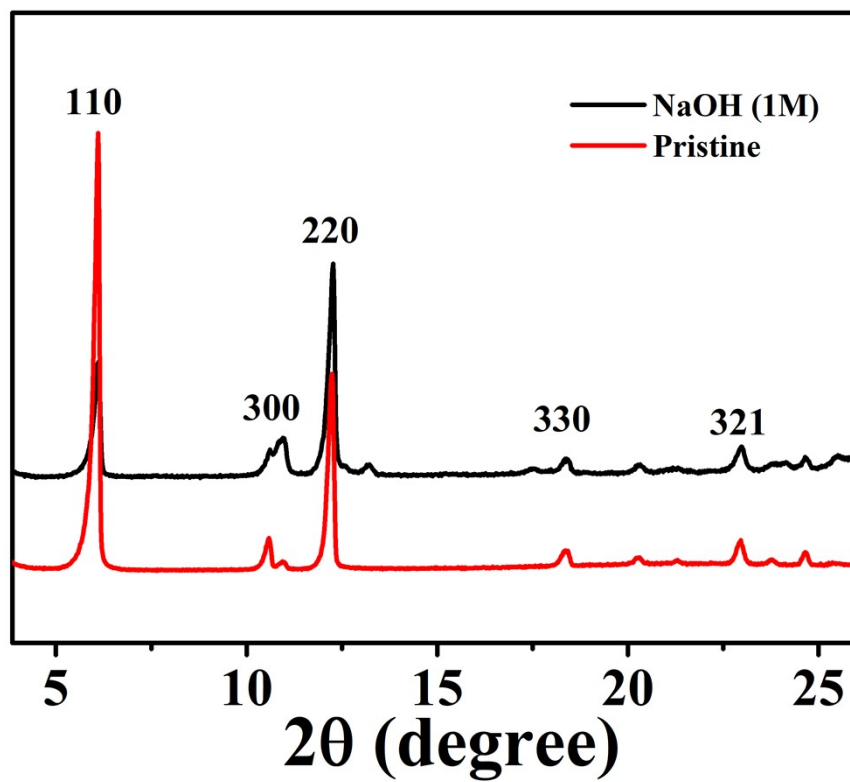

**Figure S4.** PXRD patterns of COF<sub>ML-DHTA</sub> and after treatment in 1M NaOH.

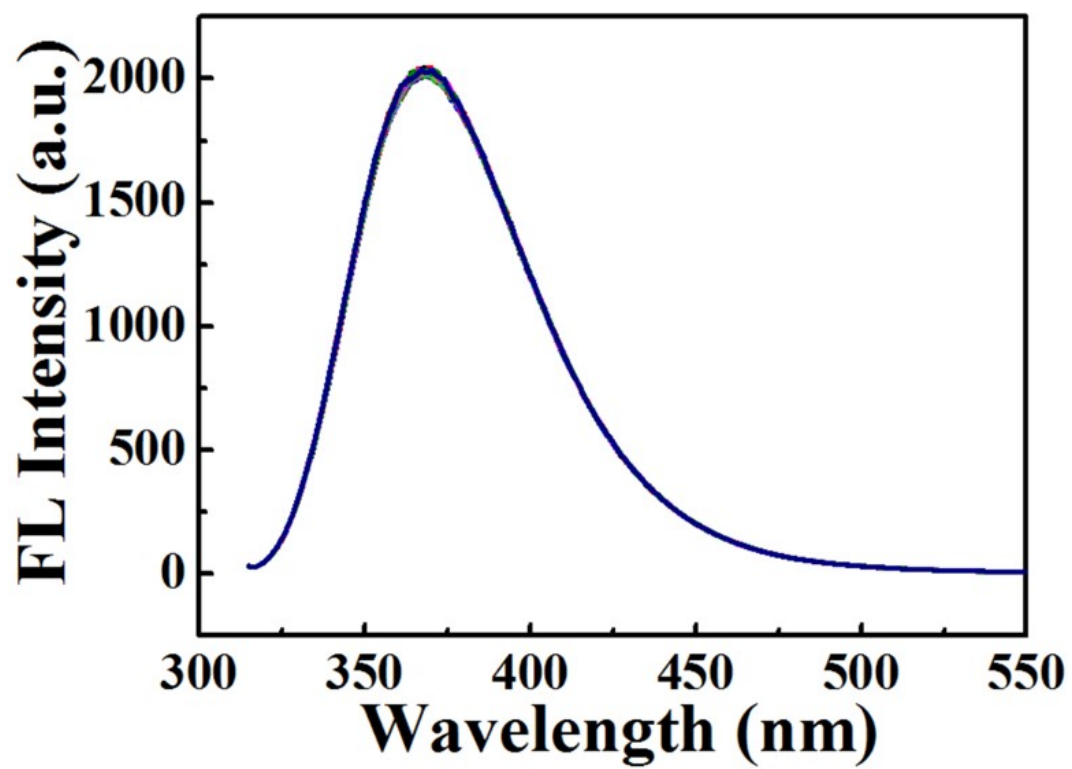

**Figure S5.** The fluorescence intensity of COF<sub>ML-DHTA</sub> material was measured continuously for 17min.

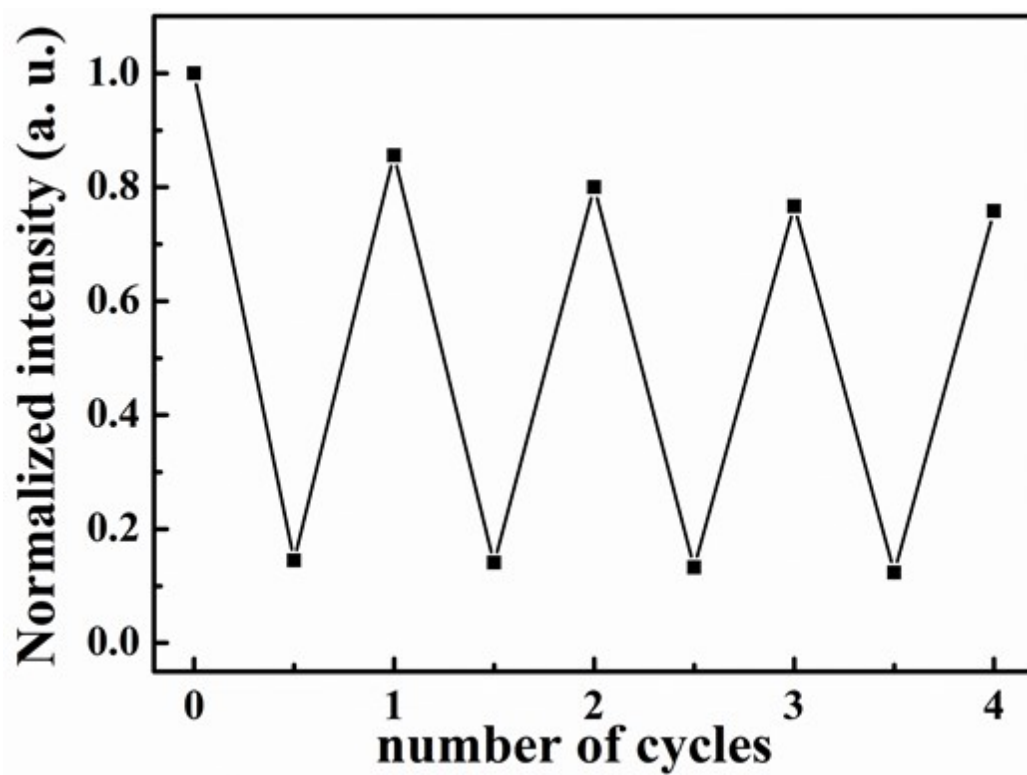

**Figure S6.** The reusability of COF<sub>ML-DHTA</sub> for four cycles

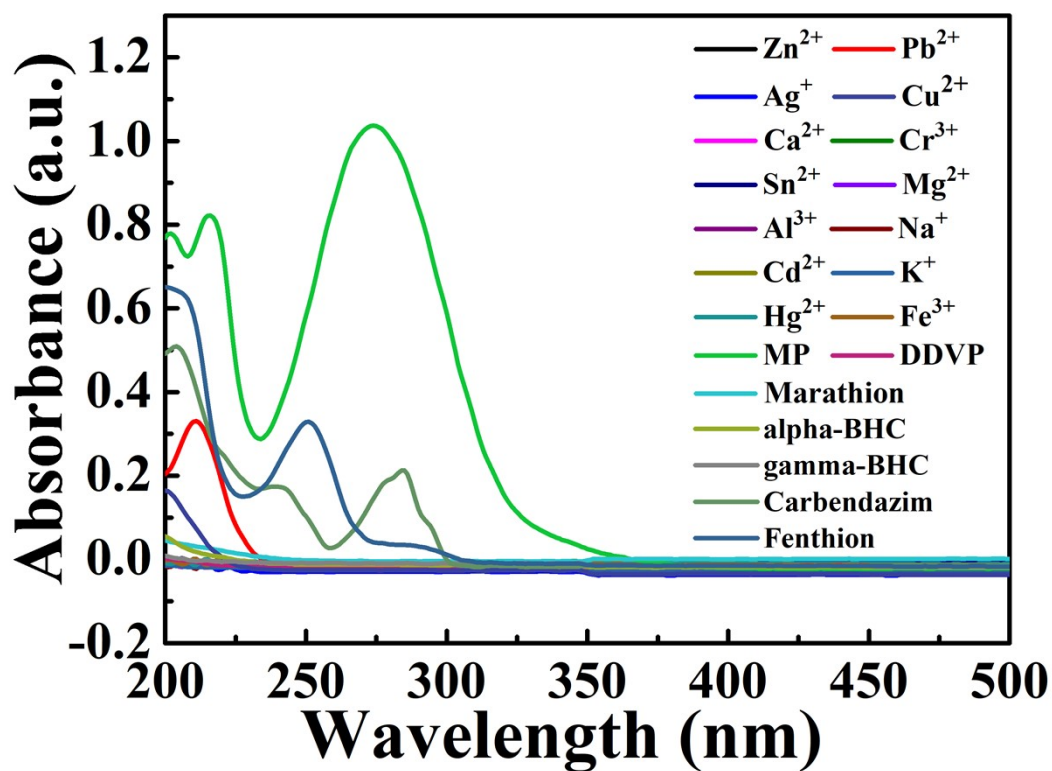

**Figure S7.** UV-vis spectra of Zn<sup>2+</sup>, Pb<sup>2+</sup>, Ag<sup>+</sup>, Cu<sup>2+</sup>, Ca<sup>2+</sup>, Cr<sup>3+</sup>, Sn<sup>2+</sup>, Mg<sup>2+</sup>, Al<sup>3+</sup>, Na<sup>+</sup>, K<sup>+</sup>, Cd<sup>2+</sup>, Hg<sup>2+</sup>, Fe<sup>3+</sup>, DDVP, malathion, fenthion, gamma-BHC, alpha-BHC and carbendazim.



**Table S1.** Crystallographic information of the modeled COF<sub>ML-DHTA</sub>

| <b>Sample name</b>      | <b>COF<sub>ML-DHTA</sub></b> |
|-------------------------|------------------------------|
| Stacking model          | ABC                          |
| a [Å]                   | 28.83444                     |
| b [Å]                   | 28.83444                     |
| c [Å]                   | 6.93499                      |
| $\alpha$ [deg]          | 90                           |
| $\beta$ [deg]           | 90                           |
| $\gamma$ [deg]          | 120                          |
| Interlayer distance (Å) | 2.3 Å                        |

**Table S2.** Atom sites for the modeled COF<sub>ML-DHTA</sub>

| <b>Atom site label</b> | <b>Atom site fraction x</b> | <b>Atom site fraction y</b> | <b>Atom site fraction z</b> |
|------------------------|-----------------------------|-----------------------------|-----------------------------|
| N1                     | 0.3028                      | 0.6128                      | 0.9306                      |
| N2                     | 0.2494                      | 0.5900                      | 0.9361                      |
| C3                     | 0.2240                      | 0.6190                      | 0.9394                      |
| N4                     | 0.2567                      | 0.6734                      | 0.9339                      |
| N5                     | 0.1640                      | 0.5950                      | 0.9533                      |
| C6                     | 0.1228                      | 0.5453                      | 0.9689                      |
| C7                     | 0.0600                      | 0.5240                      | 0.9844                      |
| C8                     | 0.0225                      | 0.4687                      | 1.0006                      |
| C9                     | 0.0344                      | 0.5542                      | 0.9846                      |
| H10                    | 0.2392                      | 0.6966                      | 0.9368                      |
| H11                    | 0.1325                      | 0.5145                      | 0.9729                      |
| H12                    | 0.0375                      | 0.4419                      | 1.0020                      |
| H13                    | 0.0583                      | 0.5963                      | 0.9733                      |
| C14                    | 0.3333                      | 0.6667                      | 0.9282                      |

**Table S3.** Comparison of analytical parameters of various probe.

| <b>Probe/Material</b>               | <b>Linear range</b>                                | <b>Detection limit</b>              | <b>Reference</b> |
|-------------------------------------|----------------------------------------------------|-------------------------------------|------------------|
| AChE-SF/Pt                          | 0.06–50 nM                                         | 0.02 nM                             | 1                |
| 4-NP                                | 1.0–1000.0 ppb                                     | 1.77 ppb                            | 2                |
| Su-TPE/PrS                          | 0–16 nM (0–384 ng mL <sup>-1</sup> )               | 0.22 nM (5.28 ng mL <sup>-1</sup> ) | 3                |
| AChE/CoPc/PVA-AWP/SPE               | 2.0–4000 nM                                        | 2.6nM                               | 4                |
| Fe <sub>3</sub> O <sub>4</sub> MNPs | -                                                  | 10 nM                               | 5                |
| This work                           | 0.57 ng mL <sup>-1</sup> to 30 µg mL <sup>-1</sup> | 0.19 ng mL <sup>-1</sup>            |                  |

**Table S4.** Recovery tests of methyl paraoxon (MP) added in actual water samples by COF<sub>ML-DHTA</sub> material.

| Samples      | Spiked MP<br>(ng mL <sup>-1</sup> ) | Measured value<br>(ng mL <sup>-1</sup> ) | Recovery<br>(%) |
|--------------|-------------------------------------|------------------------------------------|-----------------|
| Lake water 1 | 0                                   | Not detected                             | -----           |
| Lake water 2 | 4                                   | 4.25±1.89                                | 106.3           |
| Lake water 3 | 8                                   | 8.11± 4.05                               | 101.4           |
| Lake water 4 | 12                                  | 12.23± 3.51                              | 101.9           |
